# Supplementary material
Source: MDPI journal article supplement (https://www.mdpi.com/2073-4433/13/9/1473)
Supplement: s1 [file s1]

Supplementary material of

# Spatio-Temporal Changes in Air Quality of the Urban Area of Chongqing from 2015 to 2021 Based on a Missing-Data-Filled Dataset

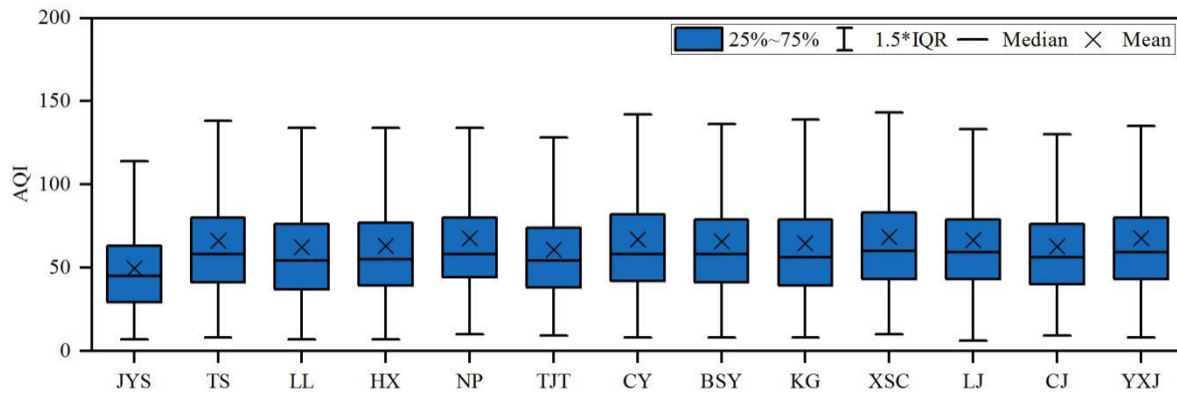

**Figure S1.** A boxplot of hourly AQI for each site from 2015 to 2021.

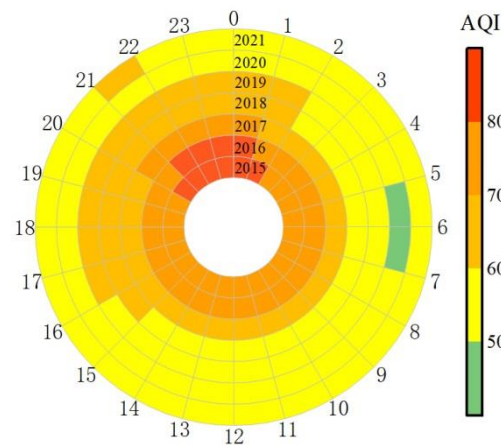

**Figure S2.** Heatmap of 24-hour mean AQI from 2015 and 2021.

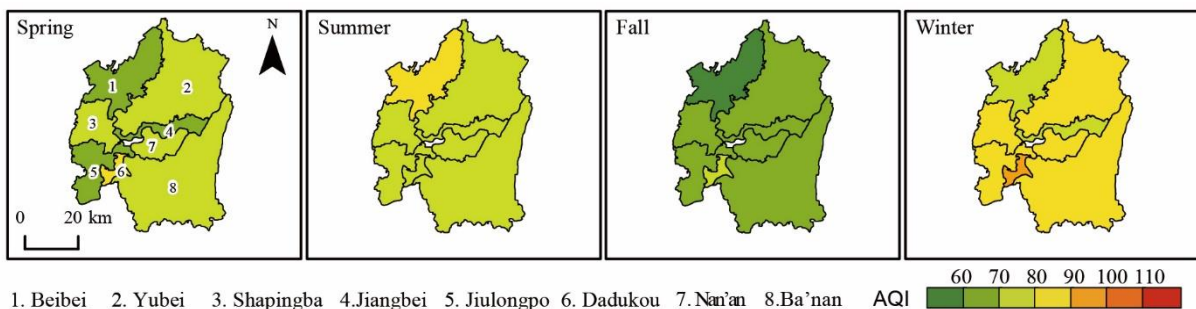

**Figure S3.** Spatial heterogeneity of seasonal AQI from 2015 to 2021.

**Table S1.** Overview of observation sites.

| Site  | Name       | Abbreviation | County    | Longitude (°E) | Latitude(°N) | Missing rate |
|-------|------------|--------------|-----------|----------------|--------------|--------------|
| 1414A | Jinyunshan | JYS          | Beibei    | 106.3787       | 29.8279      | 5.38%        |
| 1416A | Tiansheng  | TS           | Beibei    | 106.4213       | 29.8253      | 5.49%        |
| 1417A | Lianglu    | LL           | Yubei     | 106.6263       | 29.7228      | 4.46%        |
| 1418A | Huxi       | HX           | Shapingba | 106.2953       | 29.5983      | 4.36%        |
| 1419A | Nanping    | NP           | Nan'an    | 106.5777       | 29.5102      | 4.23%        |
| 1420A | Tangjiatuo | TJT          | Jiangbei  | 106.6556       | 29.6277      | 4.37%        |
| 1421A | Chayuan    | CY           | Nan'an    | 106.6349       | 29.4906      | 4.22%        |
| 1422A | Baishiyi   | BSY          | Jiulongpo | 106.3754       | 29.4572      | 5.57%        |
| 1425A | Konggang   | KG           | Yubei     | 106.6205       | 29.7166      | 4.65%        |
| 1426A | Xinshancun | XSC          | Dadukou   | 106.4782       | 29.4875      | 4.21%        |
| 1427A | Lijia      | LJ           | Yubei     | 106.5616       | 29.6453      | 4.83%        |
| 1428A | Caijia     | CJ           | Beibei    | 106.4522       | 29.7091      | 5.93%        |
| 1429A | Yuxinjie   | YXJ          | Ba'nan    | 106.5093       | 29.3917      | 4.65%        |

**Table S2.** Concentration breakpoints of pollutant items.

| IAQI | SO <sub>2</sub> (μg/m <sup>3</sup> ) |       | NO <sub>2</sub> (μg/m <sup>3</sup> ) |       | CO (mg/m <sup>3</sup> ) |       | O <sub>3</sub> (μg/m <sup>3</sup> ) |       | PM <sub>2.5</sub> (μg/m <sup>3</sup> ) |       | PM <sub>10</sub> (μg/m <sup>3</sup> ) |       |
|------|--------------------------------------|-------|--------------------------------------|-------|-------------------------|-------|-------------------------------------|-------|----------------------------------------|-------|---------------------------------------|-------|
|      | Hourly                               | Daily | Hourly                               | Daily | Hourly                  | Daily | Hourly                              | Daily | Hourly                                 | Daily | Hourly                                | Daily |
| 0    | 0                                    | 0     | 0                                    | 0     | 0                       | 0     | 0                                   | 0     | 0                                      | 0     | 0                                     | 0     |
| 50   | 150                                  | 50    | 100                                  | 40    | 5                       | 2     | 160                                 | 100   | 35                                     | 35    | 50                                    | 50    |
| 100  | 500                                  | 150   | 200                                  | 80    | 10                      | 4     | 200                                 | 160   | 75                                     | 75    | 150                                   | 150   |
| 150  | 650                                  | 475   | 700                                  | 180   | 35                      | 14    | 300                                 | 215   | 115                                    | 115   | 250                                   | 250   |
| 200  | 800                                  | 800   | 1200                                 | 280   | 60                      | 24    | 400                                 | 265   | 150                                    | 150   | 350                                   | 350   |
| 300  | 1600                                 | 1600  | 2340                                 | 565   | 90                      | 36    | 800                                 | 800   | 250                                    | 250   | 420                                   | 420   |
| 400  | 2100                                 | 2100  | 3090                                 | 750   | 120                     | 48    | 1000                                | 1000  | 350                                    | 350   | 500                                   | 500   |
| 500  | 2620                                 | 2620  | 3840                                 | 940   | 150                     | 60    | 1200                                | 1200  | 500                                    | 500   | 600                                   | 600   |

Note: Hourly and daily appearing in this table respectively refer to hourly and daily breakpoints for AQI calculation.

**Table S3.** Categories of air quality.

| Levels of Health Concern       | AQI     |
|--------------------------------|---------|
| Excellent                      | 0-50    |
| Good                           | 51-100  |
| Unhealthy for sensitive groups | 101-150 |
| Unhealthy                      | 151-200 |
| Very Unhealthy                 | 201-300 |
| Hazardous                      | 301-500 |

**Table S4 Descriptive statistics of each observation site from 2015 to 2021.**

| Site | Mean | Median | Standard Deviation | Minimum | 1st Quartile (25%) | 3rd Quartile (75%) | Maximum |
|------|------|--------|--------------------|---------|--------------------|--------------------|---------|
| JYS  | 49   | 45     | 28                 | 7       | 29                 | 63                 | 285     |
| TS   | 66   | 58     | 38                 | 8       | 41                 | 80                 | 373     |
| LL   | 62   | 54     | 38                 | 7       | 37                 | 76                 | 455     |
| HX   | 63   | 55     | 35                 | 7       | 39                 | 77                 | 302     |
| NP   | 68   | 58     | 37                 | 10      | 44                 | 80                 | 335     |
| TJT  | 61   | 54     | 33                 | 9       | 38                 | 74                 | 324     |
| CY   | 67   | 58     | 37                 | 8       | 42                 | 82                 | 420     |
| BSY  | 66   | 58     | 37                 | 8       | 41                 | 79                 | 348     |
| KG   | 65   | 56     | 37                 | 8       | 39                 | 79                 | 344     |
| XSC  | 68   | 60     | 39                 | 10      | 43                 | 83                 | 500     |
| LJ   | 66   | 59     | 36                 | 6       | 43                 | 79                 | 500     |
| CJ   | 63   | 56     | 34                 | 9       | 40                 | 76                 | 455     |
| YXJ  | 68   | 59     | 38                 | 8       | 43                 | 80                 | 500     |

**Table S5. Primary contributors of polluted days in Chongqing from 2015 to 2021.**

| Year  | Days of primary pollutants |                |                 |                  |                 |    | Polluted days | Non-polluted days | Recorded days |
|-------|----------------------------|----------------|-----------------|------------------|-----------------|----|---------------|-------------------|---------------|
|       | PM <sub>2.5</sub>          | O <sub>3</sub> | NO <sub>2</sub> | PM <sub>10</sub> | SO <sub>2</sub> | CO |               |                   |               |
| 2015  | 61                         | 15             | 0               | 0                | 0               | 0  | 76            | 288               | 364           |
| 2016  | 70                         | 21             | 0               | 0                | 0               | 0  | 91            | 275               | 366           |
| 2017  | 52                         | 44             | 0               | 1                | 0               | 0  | 97            | 268               | 365           |
| 2018  | 31                         | 41             | 4               | 0                | 0               | 0  | 76            | 289               | 365           |
| 2019  | 27                         | 36             | 0               | 0                | 0               | 0  | 63            | 302               | 365           |
| 2020  | 15                         | 28             | 0               | 0                | 0               | 0  | 43            | 323               | 366           |
| 2021  | 33                         | 27             | 0               | 0                | 0               | 0  | 60            | 305               | 365           |
| Total | 289                        | 212            | 4               | 1                | 0               | 0  | 506           | 2050              | 2556          |
